# Supplementary material
Source: MDPI journal article supplement (https://www.mdpi.com/2073-4441/16/10/1343)
Supplement: s1 [file s1]

Supplementary Information for

**Potential climate and water-use effects on water-quality trends in a semiarid, western U.S. watershed: Fountain Creek, Colorado, USA**

Carleton R. Bern, Manya H. Ruckhaus, Erin Hennessy

U.S. Geological Survey, Colorado Water Science Center, Denver, Colorado, U.S.A.

email: cbern@usgs.gov

***Any use of trade, firm, or product names is for descriptive purposes only and does not imply endorsement by the U.S. Government.***

Table S1. Information relating to the regressions between specific conductance and total dissolved solids for the 8 streamgage sites in the study [1].

|                                           | 07103700<br>FOUNTAIN<br>CREEK NEAR<br>COLORADO<br>SPRINGS, CO <sup>1</sup> | 07103970<br>MONUMENT<br>CR ABV<br>WOODMEN<br>RD AT<br>COLORADO<br>SPRINGS, CO | 07104905<br>MONUMENT<br>CREEK AT<br>BIJOU ST. AT<br>COLO.<br>SPRINGS, CO <sup>1</sup> | 07105500<br>FOUNTAIN<br>CREEK AT<br>COLORADO<br>SPRINGS, CO <sup>1</sup> | 07105530<br>FOUNTAIN CR<br>BLW JANITELL<br>RD BLW<br>COLO.<br>SPRINGS, CO <sup>1</sup> | 07105800<br>FOUNTAIN<br>CREEK AT<br>SECURITY,<br>CO <sup>1</sup> | 07106000<br>FOUNTAIN<br>CREEK NEAR<br>FOUNTAIN,<br>CO <sup>2</sup> | 07106500<br>FOUNTAIN<br>CREEK AT<br>PUEBLO, CO <sup>3</sup> |
|-------------------------------------------|----------------------------------------------------------------------------|-------------------------------------------------------------------------------|---------------------------------------------------------------------------------------|--------------------------------------------------------------------------|----------------------------------------------------------------------------------------|------------------------------------------------------------------|--------------------------------------------------------------------|-------------------------------------------------------------|
| Equation                                  | $TDS = 0.576 * SC + 5.65$                                                  | NA                                                                            | $TDS = 0.609 * SC + 10.5$                                                             | $TDS = 0.597 * SC + 17.91$                                               | $TDS = 0.658 * SC - 24.3$                                                              | $TDS = 0.643 * SC - 9.12$                                        | $TDS = 0.648 * SC + 15$                                            | $TDS = 0.808 * SC - 121$                                    |
| Number of samples                         | 36                                                                         | NA                                                                            | 37                                                                                    | 40                                                                       | 36                                                                                     | 36                                                               | 56                                                                 | 92                                                          |
| R <sup>2</sup>                            | 0.93                                                                       | NA                                                                            | 0.89                                                                                  | 0.95                                                                     | 0.87                                                                                   | 0.85                                                             | 0.85                                                               | 0.92                                                        |
| Period used for existing equation         | 2011-2013                                                                  | NA                                                                            | 2011-2014                                                                             | 2011-2013                                                                | 2011-2013                                                                              | 2011-2013                                                        | 2004-2022                                                          | 2003-2022                                                   |
| Period of record for discrete TDS samples | 2011-2013                                                                  | NA                                                                            | 2011-2014                                                                             | 2009, 2011-2013                                                          | 2011-2013                                                                              | 2011-2013                                                        | 2004-2008, 2011-2013, 2022                                         | 1963-1965, 1988, 1990-1993, 2003-2022                       |
|                                           |                                                                            |                                                                               |                                                                                       |                                                                          |                                                                                        |                                                                  |                                                                    |                                                             |

<sup>1</sup>This study

<sup>2</sup> Equations published: <https://doi.org/10.3133/sir20105069>[2]

<sup>3</sup> Equations published:  
<https://doi.org/10.3133/sir20045024>[3]

Table S2. Data points retained after the z-score culling procedure versus total number of data points for unfiltered water-quality constituents

data analysis. [1]

| Parameter                                                                            | 07103700<br>FOUNTAIN<br>CREEK<br>NEAR<br>COLORADO<br>SPRINGS,<br>CO. | 07103970<br>MONUMENT CR<br>ABV WOODMEN<br>RD AT<br>COLORADO<br>SPRINGS, CO | 07104905<br>MONUMENT<br>CREEK AT<br>BIJOU ST. AT<br>COLO.<br>SPRINGS, CO | 07105500<br>FOUNTAIN<br>CREEK AT<br>COLORADO<br>SPRINGS,<br>CO | 07105530<br>FOUNTAIN CR<br>BLW JANITELL<br>RD BLW COLO.<br>SPRINGS, CO | 07105800<br>FOUNTAIN<br>CREEK AT<br>SECURITY, CO | 07106000<br>FOUNTAIN<br>CREEK<br>NEAR<br>FOUNTAIN,<br>CO | 07106500<br>FOUNTAIN<br>CREEK AT<br>PUEBLO, CO |
|--------------------------------------------------------------------------------------|----------------------------------------------------------------------|----------------------------------------------------------------------------|--------------------------------------------------------------------------|----------------------------------------------------------------|------------------------------------------------------------------------|--------------------------------------------------|----------------------------------------------------------|------------------------------------------------|
| Phosphorus, water,<br>unfiltered, milligrams<br>per liter as phosphorus              | 140/192                                                              | 187/194                                                                    | 170/176                                                                  | 190/222                                                        | 213/216                                                                | 197/215                                          | 172/176                                                  | 167/179                                        |
| Total nitrogen [nitrate<br>+ nitrite + ammonia +<br>organic-N], water,<br>unfiltered | 106/112                                                              | 111/112                                                                    | 130/130                                                                  | 128/129                                                        | 135/136                                                                | 122/122                                          | 119/119                                                  | 121/122                                        |
| Selenium, water,<br>unfiltered, micrograms<br>per liter                              | 167/183                                                              | 184/191                                                                    | 149/151                                                                  | 179/181                                                        | 180/180                                                                | 175/179                                          | 150/151                                                  | 163/167                                        |
| Arsenic, Total,<br>unfiltered, ug/L                                                  | 154/190                                                              | 187/193                                                                    | 151/151                                                                  | 176/185                                                        | 174/181                                                                | 159/180                                          | 107/110                                                  | 103/109                                        |
| Iron, water, unfiltered,<br>recoverable,<br>micrograms per liter                     | 79/87                                                                | 82/87                                                                      | 81/85                                                                    | 83/84                                                          | 83/85                                                                  | 84/86                                            | 80/83                                                    | 78/82                                          |
| Lead, water, unfiltered,<br>recoverable,<br>micrograms per liter                     | 124/169                                                              | 159/167                                                                    | 91/91                                                                    | 121/157                                                        | 149/157                                                                | 65/67                                            | –                                                        | –                                              |

Table S3. Concentration trend likelihood output from the WRTDS analysis[4-6]. NA indicates that no data were available and NRD indicates that no recent data covering the last few years were available. Site names from Table 1

| Constituent            | Fountain Creek, upstream        | Monument Creek, upstream        | Monument Creek at Bijou Street  | Fountain Creek at Colorado Springs | Janitell Road                   | Security                        | Fountain                        | Pueblo                          |
|------------------------|---------------------------------|---------------------------------|---------------------------------|------------------------------------|---------------------------------|---------------------------------|---------------------------------|---------------------------------|
| Unfiltered phosphorus  | Downward trend is highly likely | Upward trend is likely          | Either trend is likely as not   | Upward trend is likely             | Either trend is likely as not   | Downward trend is highly likely | Downward trend is very likely   | Downward trend is likely        |
| Orthophosphate         | Downward trend is highly likely | Downward trend is likely        | Upward trend is highly likely   | Upward trend is highly likely      | Downward trend is likely        | NRD                             | NRD                             | Downward trend is highly likely |
| Unfiltered nitrogen    | Downward trend is highly likely | Upward trend is highly likely   | Either trend is likely as not   | Either trend is likely as not      | Upward trend is very likely     | Upward trend is likely          | Upward trend is highly likely   | Upward trend is highly likely   |
| Nitrate plus nitrite   | Downward trend is highly likely | Downward trend is highly likely | Upward trend is highly likely   | Upward trend is highly likely      | Upward trend is highly likely   | NRD                             | NRD                             | Upward trend is likely          |
| Ammonia and ammonium   | Downward trend is likely        | Downward trend is likely        | Upward trend is likely          | Upward trend is likely             | Downward trend is likely        | NRD                             | Downward trend is very likely   | Downward trend is highly likely |
| Total dissolved solids | Downward trend is highly likely | NA                              | Upward trend is highly likely   | Upward trend is likely             | Downward trend is likely        | Downward trend is likely        | Downward trend is highly likely | Downward trend is highly likely |
| Chloride               | NA                              | NA                              | Upward trend is highly likely   | Upward trend is likely             | Upward trend is highly likely   | NA                              | NA                              | NA                              |
| Unfiltered selenium    | Downward trend is highly likely | Downward trend is likely        | Downward trend is highly likely | Downward trend is highly likely    | Downward trend is highly likely | Downward trend is highly likely | Downward trend is highly likely | Downward trend is highly likely |
| Filtered selenium      | Downward trend is highly likely    | Downward trend is highly likely | Downward trend is highly likely | NA                              | Downward trend is highly likely |

|                    |                                 |                                 |                                 |                                 |                                 |                                 |                                 |                                 |
|--------------------|---------------------------------|---------------------------------|---------------------------------|---------------------------------|---------------------------------|---------------------------------|---------------------------------|---------------------------------|
| Unfiltered arsenic | Downward trend is highly likely |
| Filtered arsenic   | NA                              | NA                              | Downward trend is likely        | Downward trend is highly likely | Downward trend is highly likely | Downward trend is highly likely | Downward trend is highly likely | Downward trend is highly likely |
| Unfiltered iron    | Downward trend is likely        | Downward trend is highly likely | Downward trend is highly likely | Downward trend is highly likely | Downward trend is likely        | Downward trend is highly likely | Downward trend is very likely   | Downward trend is likely        |
| Unfiltered lead    | Either trend is likely as not   | Downward trend is likely        | Downward trend is likely        | Downward trend is likely        | Downward trend is highly likely | NRD                             | NA                              | NA                              |
| Filtered manganese | Downward trend is highly likely | Upward trend is highly likely   | Upward trend is highly likely   | Upward trend is highly likely   | Downward trend is highly likely | Downward trend is highly likely | Downward trend is highly likely | Either trend is likely as not   |

**Fig. S1** Potable water production for customers of Colorado Springs Utilities from 2000 through 2022 depicted as daily production and water year (WY) mean production [7]. The significant ( $p = 0.013$ ) trend for WY mean is depicted for reference and has a slope of  $-2.15$  ML/yr [7].

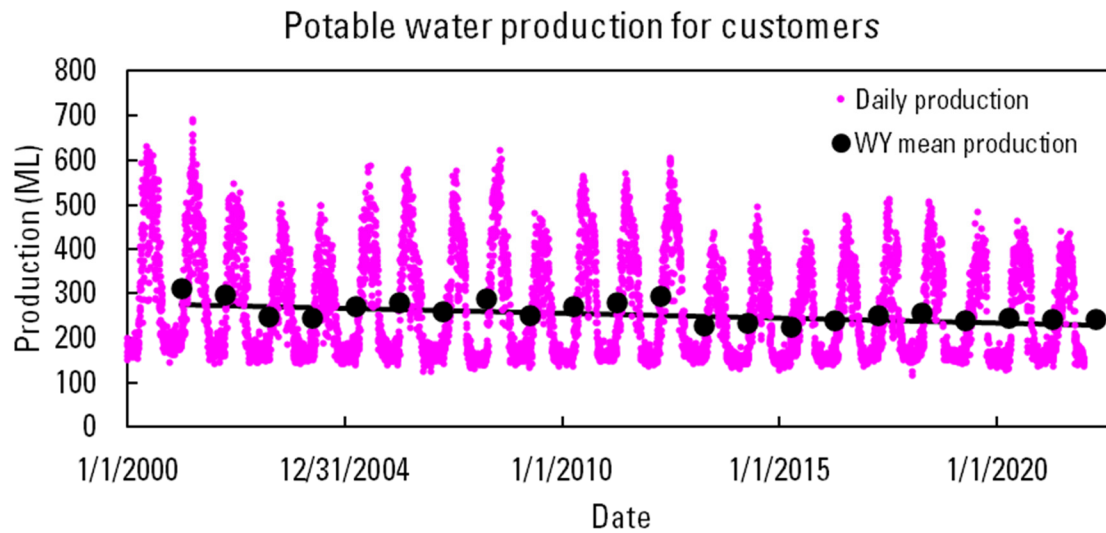

Fig. S2 Ratios of filtered, orthophosphate as P to unfiltered phosphorus as P plotted through time for individual samples at the sites: (a) Fountain Creek, upstream, (b) Monument Creek, upstream, (c) Monument Creek at Bijou Street, (d) Fountain Creek at Colorado Springs, (e) Janitell Road, (f) Security, (g) Fountain, (h) Pueblo [1]. For reference, vertical lines indicate when the JD Phillips facility began taking some of the wastewater treatment load from the Las Vegas Street facility.

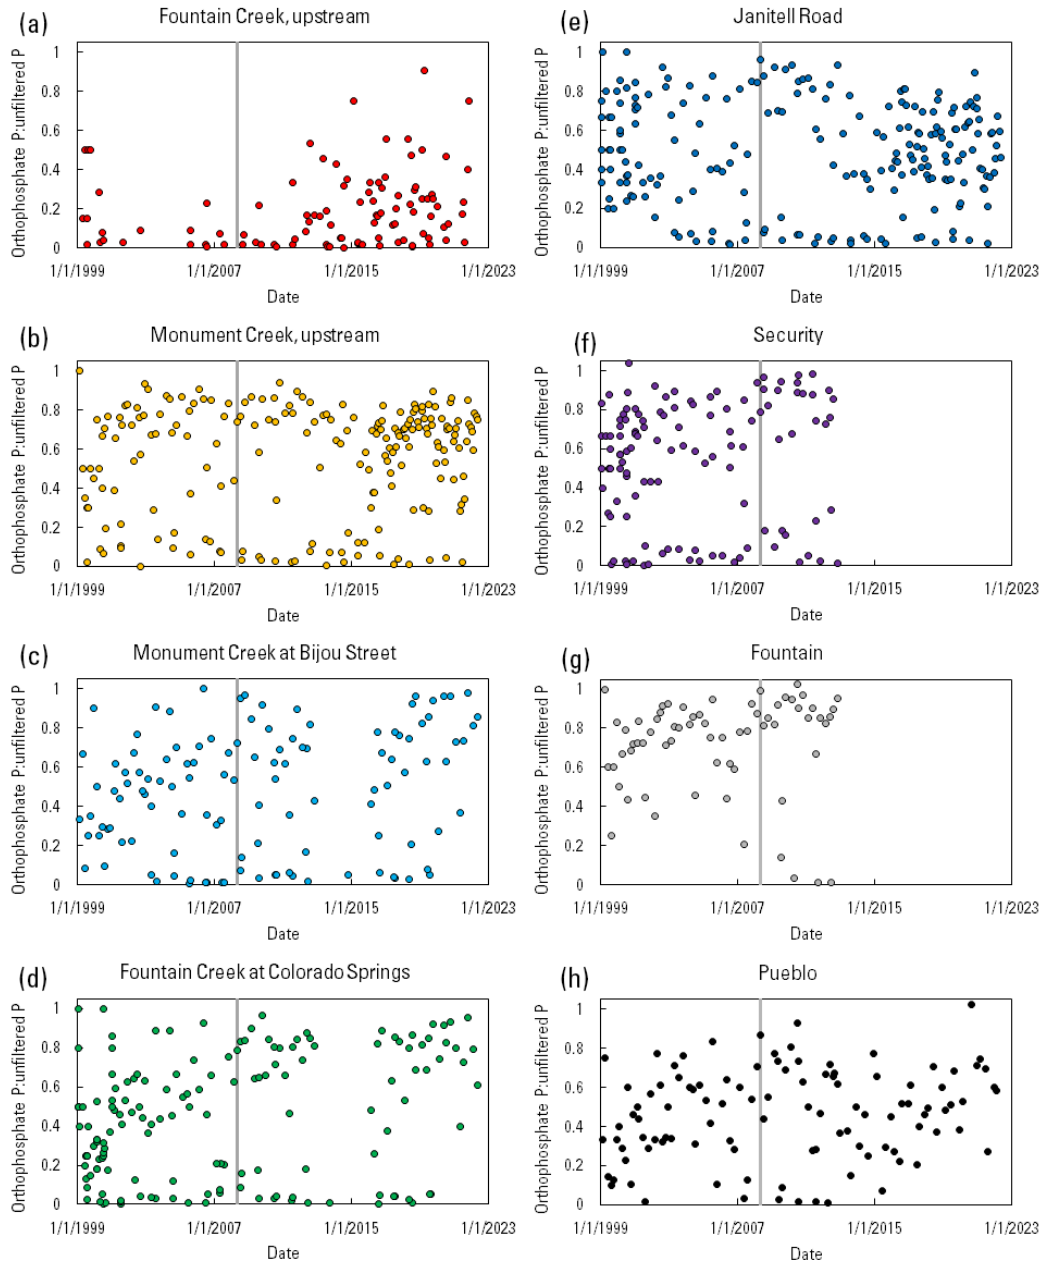

Fig. S3 Ratios of filtered nitrate plus nitrite as N to unfiltered nitrogen as P plotted through time for individual samples at the sites: (a) Fountain Creek, upstream, (b) Monument Creek, upstream, (c) Monument Creek at Bijou Street, (d) Fountain Creek at Colorado Springs, (e) Janitell Road, (f) Security, (g) Fountain, (h) Pueblo [1]. For reference, vertical lines indicate when the JD Phillips facility began taking some of the wastewater treatment load from the Las Vegas Street facility.

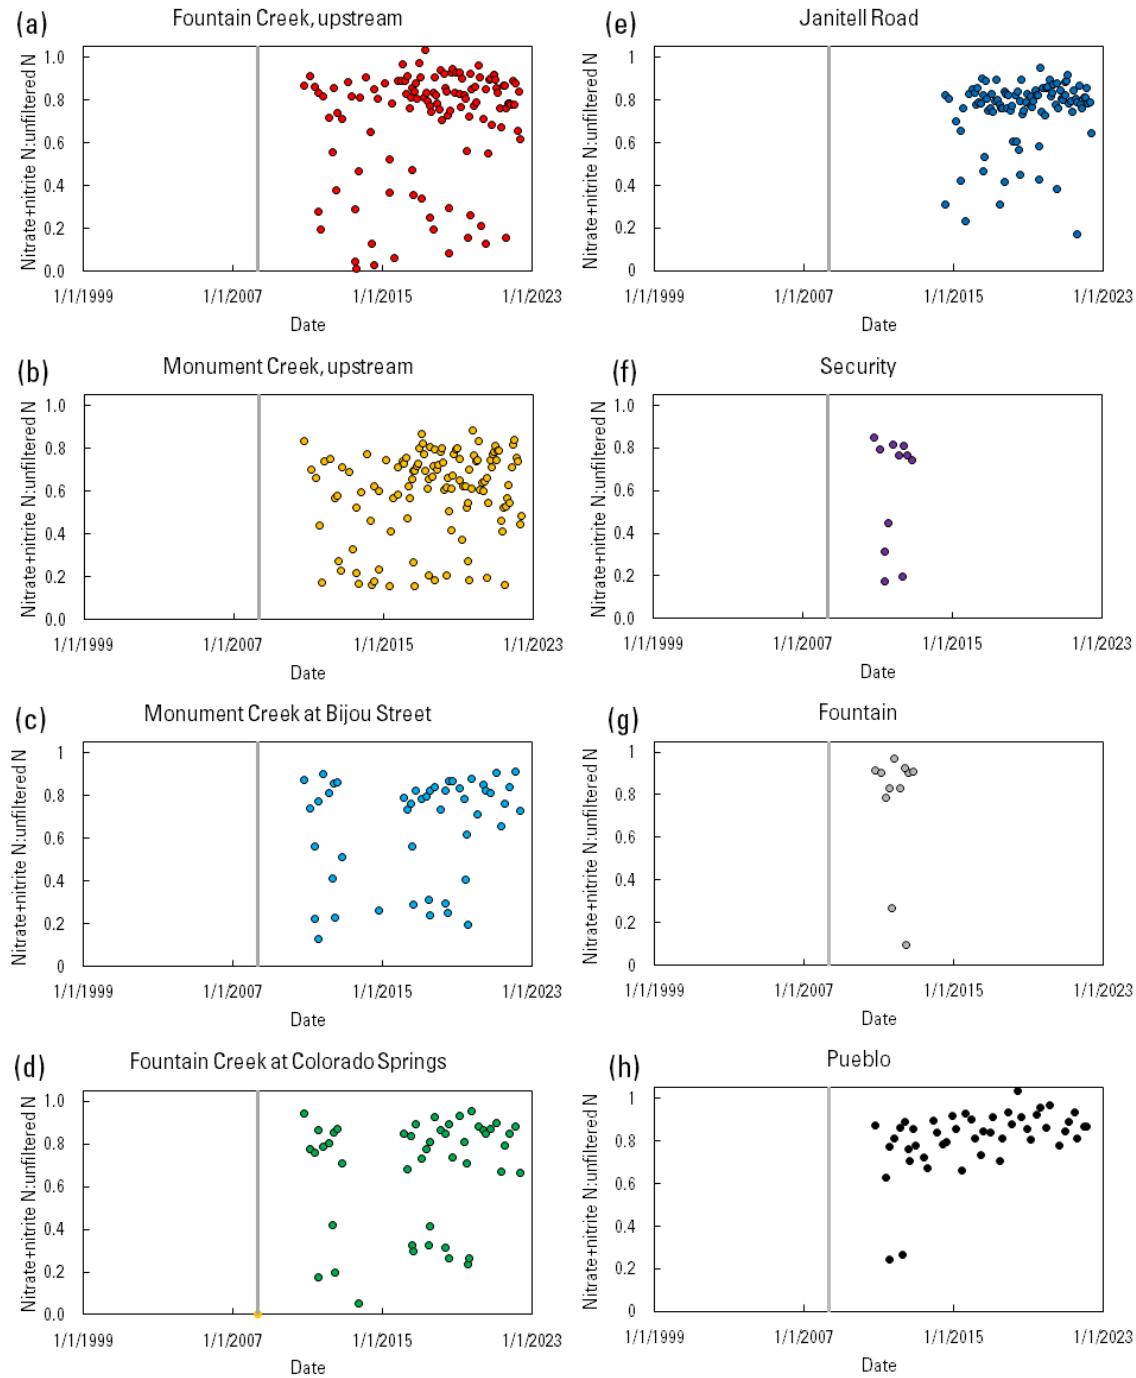



Fig. S4. Ratios of reactive nitrogen (nitrate plus nitrite) to reactive phosphorus (orthophosphate) plotted through time for individual samples at the sites: (a) Fountain Creek, upstream, (b) Monument Creek, upstream, (c) Monument Creek at Bijou Street, (d) Fountain Creek at Colorado Springs, (e) Janitell Road, (f) Security, (g) Fountain, (h) Pueblo [1]. For reference, vertical lines indicate when the JD Phillips facility began taking some of the wastewater treatment load from the Las Vegas Street facility.

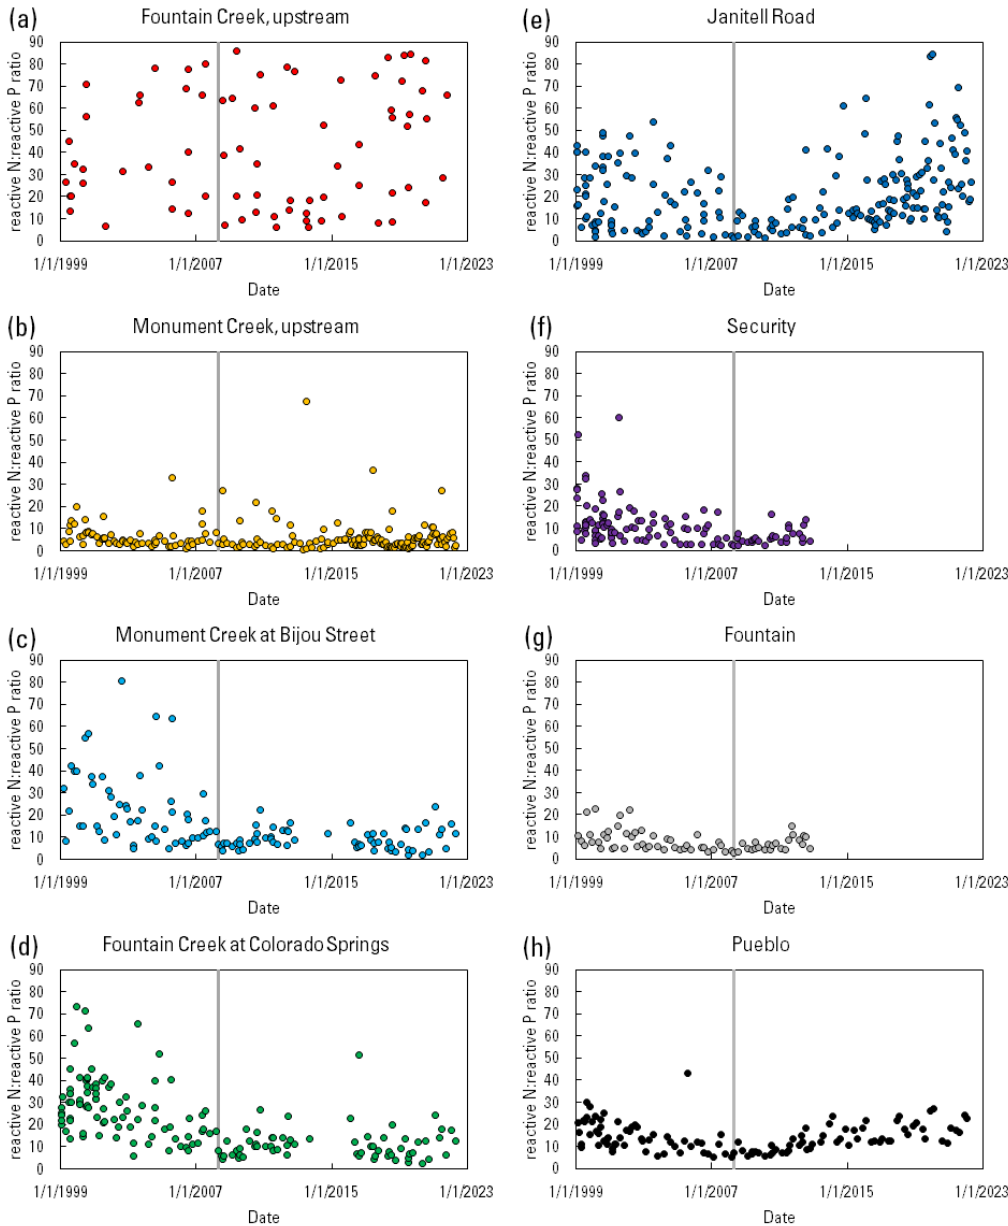

## References

1. U.S. Geological Survey (USGS), *USGS water data for the Nation*. U.S. Geological Survey National Water Information System database. 2023: p. <https://doi.org/10.5066/F7P55KJN>.
2. Miller, L.D., K.R. Watts, R.F. Ortiz, and T. Ivahnenko, *Occurrence and distribution of dissolved solids, selenium, and uranium in groundwater and surface water in the Arkansas River Basin from the headwaters to Coolidge, Kansas, 1970-2009*. USGS Scientific Investigations Report, 2010. **2010-5069**: p. 59 p., <https://doi.org/10.3133/sir20105069>.
3. Ortiz, R.F., *Methods to identify changes in background water-quality conditions using dissolved-solids concentrations and loads as indicators, Arkansas River and Fountain Creek in the vicinity of Pueblo, Colorado*. U.S. Geological Survey, Scientific Investigations Report, 2004. **2004-5024**: p. 20 p., <https://pubs.er.usgs.gov/publication/sir20045024>.
4. Hirsch, R.M., S.A. Archfield, and L.A. de Cicco, *A bootstrap method for estimating uncertainty of water quality trends*. Environmental Modelling & Software, 2015. **73**: p. 148-166, <https://doi.org/10.1016/j.envsoft.2015.07.017>.
5. Hirsch, R.M. and L.A. De Cicco, *User guide to Exploration and Graphics for RivEr Trends (EGRET) and dataRetrieval: R packages for hydrologic data*, in *U.S. Geological Survey Techniques and Methods 4A-10*. 2014, U.S. Geological Survey, Reston, VA. p. <https://pubs.usgs.gov/tm/04/a10/>.
6. Hirsch, R.M., D.L. Moyer, and S.A. Archfield, *Weighted Regressions on Time, Discharge, and Season (WRTDS), with an Application to Chesapeake Bay River Inputs*. Journal of the American Water Resources Association, 2010. **46**: p. 857-880, <https://doi.org/10.1111/j.1752-1688.2010.00482.x>.
7. Bern, C.R. and S.L. Qi, *Daily potable water deliveries and effluent discharge by Colorado Springs Utilities: 2008–2022*. U.S. Geological Survey data release, 2024: p. <https://doi.org/10.5066/P97BJ1KK>.
